# Supplementary material for: The plasma peptides of breast versus ovarian cancer
Source: Clin Proteomics. 2019 Dec 23;16:43. doi: 10.1186/s12014-019-9262-0 (PMC6927194; doi:10.1186/s12014-019-9262-0)
Supplement: Supplementary file 1 — Additional file 1: Table S1. Breast versus ovarian MSMS TRYP and STYP where both X2 where the corrected delta frequency is greater than 9. [file 12014_2019_9262_MOESM1_ESM.xlsx]

## Sheet: Sheet1
Breast versus ovarian MSMS TRYP & STYP where both X2 where the corrected delta frequency is greater than 9
Tryptic				Tryptic STYP
Gene_Symbol	meanX2	n(proteins per Gene Symbol)		Gene_Symbol	meanSTYPX2	n(proteins per Gene Symbol)
CPEB1	3632.92	8		LTBP4	4340.22	1
LTBP4	2560.47	1		C19orf82	3256.7	1
HIF-1A	1640.98	1		PMEPA1	1849.26	1
C4A	1626.87	2		C4A	1703.13	2
C4B	1626.87	2		HIF-1A	1668.95	1
C4B_2	1612.01	1		C4B_2	1648.1	1
C3	757.058	2		C4B	1637.23	2
IGHE	656.105	1		CA7	1582.27	1
RAB44	656.105	1		PCDHGA5	1462.85	2
NEFM	652.141	5		C8orf34	1189.44	5
C19orf82	613.883	1		C3	835.343	2
SLC35B1	479.467	1		KNOP1	822.637	3
C8orf34	460.113	5		AMMECR1L	794.025	5
1D12A	432.719	1		HMMR	699.705	1
HIF1A	352.517	3		HTR3B	670.791	1
OCLN	341.836	3		PCDHJ	611.647	1
APOE	336.149	3		ZFAND1	522.966	2
PTPDC1	316.183	2		PPID	522.528	1
EYA1	306.859	1		OXER1	509.702	1
HLA-DRB1	306.859	1		DCHS2	507.103	1
WWC1	294.679	9		RAB44	449.029	1
ZNF562	273.551	13		NUP50	431.636	4
CFI	251.996	7		HLA-DRB1	417.239	1
MGAT1	241.814	1		PCED1A	375.63	4
NDUFA1	241.814	1		HIF1A	304.827	3
NOGOC	241.814	1		CHMP5	297.08	2
OR1E1	241.814	1		HMP19	289.436	5
OR1E2	241.814	1		LOC102723665	286.502	1
PTMA	234.939	1		CYC1	260.818	2
HSA12	218.337	1		GCSH	260.052	1
ELTD1	206.644	1		CNBP	259.243	7
GCSH	202.575	1		SMIM12	256.549	1
TBX15	189.544	3		ZNF836	248.896	1
NR2C2	183.913	3		APOE	245.923	3
GALNT9	179.28	2		ZNF9	232.774	1
FLJ00045	179.123	1		LOC101060770	229.779	1
PDLIM1	179.123	1		ZNF438	219.772	3
LRRC4B	173.187	1		WEE1	198.983	4
ASH2L	172.165	7		NOGOC	198.488	1
WNT9B	149.267	3		BHMT2	195.709	2
SLC2A4	146.882	1		COPG2	195.328	1
ZNF101	146.536	4		FASTKD3	183.631	1
LGALS7	145.039	1		POC1A	183.616	4
SFRS8	145.039	1		PROSC	179.695	2
MREG	140.177	1		E4-DBP	177.427	1
EID2	139.184	2		LMO2	176.798	2
THOC1	138.615	3		ARL6IP1	173.526	3
DKFZp779G1236	136.775	1		AKAP6	172.057	7
DDX47	136.639	2		ARHGDIA	168.386	1
CCDC47	136.412	1		PTPRE	166.718	5
ERLIN1	136.412	1		ADRBK2	166.433	1
SPFH1	136.412	1		C-CBL	166.433	1
WT1	134.792	10		DGCR5	166.433	1
MAP3K8	133.777	1		LCN1	166.433	1
EMILIN1	133.598	4		NPRL3	166.433	1
PTPRE	130.998	5		YIF1B	165.927	1
SLCO3A1	130.915	4		TCEAL7	155.65	1
ITIH3	129.353	5		FAM113A	149.235	1
FAM188B2	129.056	3		NSG2	149.235	1
FBL	125.468	1		SDSL	145.094	3
PPFIBP1	124.995	18		hCG_1990170	139.85	1
TFAP2D	123.002	1		LOC728032	139.85	1
CEACAM3	119.867	1		TTYH2	139.85	2
FBXL19-AS1	119.867	1		C16orf58	134.804	4
HLA-A	119.867	1		LMO3	130.408	11
tgat	119.867	1		ITIH4	130.202	2
DKFZp686I1750	118.927	1		SLC25A48	126.769	2
hCG_2044305	118.927	1		CCDC36	125.27	2
TNNT2	115.596	16		DKFZp686H14204	125.27	1
TBX18	114.101	4		AVL9	122.694	7
TCEB3B	110.654	1		CEACAM3	115.579	1
NUP50	110.573	4		CNBD1	115.579	1
RUNDC1	109.65	2		ERIC-1s	115.579	1
CCDC88B	108.577	4		NFYB	115.579	3
PCNA	108.479	2		OR13H1	115.579	1
SAT2	104.797	3		PSMD5	115.579	2
AYTL2	102.642	1		C10orf76	114.978	2
DKFZp686E2262	102.14	1		ADAMTS16	114.4	1
F13A1	100.975	7		CASP9	114.207	1
CLMP	99.2447	1		PLEK	113.178	1
EXOSC2	97.092	1		RPS6KB1	111.187	5
HNTN1	97.092	1		CCNI2	110.918	3
HPV45	97.092	1		HLA-A	109.94	3
LOC283685	97.092	1		EMILIN1	107.847	4
NAB1	97.092	1		SPRN	106.623	1
RNPS1	97.092	1		RBMX2	103.899	3
SHC2	97.092	1		ACVR1B	102.818	4
SLC12A5	97.092	1		WTAP	102.638	3
TPGS1	97.092	1		EID2	100.272	2
WFDC3	97.092	2		RBM7	99.216	4
ZAP70	97.092	1		PPP1R15A	98.716	1
IQCJ-SCHIP1	92.9831	3		PTPRA	97.2997	5
CD74	91.9886	1		CCNT1	96.2163	1
LPCAT1	91.9886	1		HECA	95.8105	1
PCDHJ	90.72	1		CDC37	95.7302	4
E4-DBP	89.729	1		TATDN3	95.2404	3
CHMP5	89.2716	2		CLMP	95.0636	1
SLC22A12	88.997	3		C6orf99	93.6186	1
ZNF428	88.4761	3		COLGALT2	93.6186	1
FYCO1	87.9367	3		DKFZp313K2110	93.6186	1
SULT1E1	87.9194	1		DTNA	93.6186	1
ADRA2B	87.5545	1		G2E3	93.6186	1
FAM86B2	87.5545	4		GPR162	93.6186	1
TNNI3	87.5545	1		IL13	93.6186	1
UBB	87.5545	1		KCNJ18	93.6186	2
ZNF57	87.5545	1		MAGEA8	93.6186	1
AFF4	85.6111	4		PRUNE	93.6186	3
DHX37	84.7401	3		SFI1	93.6186	1
LARS	84.6565	4		TBCB	93.6186	1
ITIH4	84.5351	2		USP29	93.6186	2
RP1L1	83.071	2		C8orf58	93.2436	3
ANXA4	82.8293	5		DDX47	91.3742	3
EMX1	82.7102	2		FGG	90.6244	3
WNT5B	81.738	4		MAGOHB	88.5997	4
WNT5A	81.6375	3		HEL-9	88.3057	1
DCHS2	81.2087	1		CCDC47	87.7986	1
MERTK	80.914	5		ZCCHC8	86.7297	6
BHMT2	80.2786	2		PGM5	85.5763	1
RAE1	80.2631	1		DKFZp779F115	84.1879	1
RPL35A	80.2631	1		GPR68	84.1879	1
GGCT	78.3921	4		LOC100294360	84.1879	1
PCDHGB1	77.1903	3		TMEM185B	84.1879	1
SMARCA5	76.5719	1		TMEM239	84.1879	1
LRPPRC	76.4286	5		TMEM79	84.1879	1
AK9	76.3331	2		TRAPPC2L	84.1879	1
FASTKD3	75.4452	1		RAPGEFL1	83.027	3
IMPA2	74.3106	3		EXD3	82.9873	1
FAM113A	73.666	1		ALKBH8	80.2639	5
INTS10	73.666	1		ACVR1C	79.0431	4
NEU4	73.666	1		SEL1L2	78.8915	10
ODZ3	73.666	1		TLR3	77.6445	3
TSC22D4	73.666	1		FAM35A	77.3537	4
PMM2	73.2885	2		GLTSCR2	77.2374	1
SLC38A1	73.2885	2		KCTD20	76.6754	4
DKFZp686E13109	72.9074	1		ATXN3	76.2648	119
SGK2	72.799	4		FHL2	74.1734	5
HMGN3	72.1953	7		SCN7A	73.4354	4
gs93	72.1359	1		HINT2	73.0669	1
ARHGEF16	70.9056	2		ALDH1A1	72.423	4
GOLGA6L2	70.8062	2		CCDC24	72.4065	3
PTPRB	70.804	10		JPH4	72.1191	1
CDKN2A	69.7814	1		MAP3K8	72.1191	1
RPA1	69.5928	2		AAG11	70.8157	1
FKBP15	69.4435	3		CEP97	70.8157	3
APOC4-APOC2	68.7772	1		HFE2	70.8157	1
SMG9	68.5197	2		TOP2A	70.5563	3
ATG16L1	67.6658	8		CHAMP1	70.1056	1
CYYR1-AS1	67.3211	2		RBM15	66.9986	2
PCED1A	65.6056	3		HIST1H2BM	66.8416	2
DNMT3A	65.357	2		FLJ00189	66.5158	1
TNFRSF8	65.357	2		NPIPA2	66.5158	1
FLJ10035	65.2451	1		RASGEF1C	66.5158	1
ASNSD1	64.2578	4		MMS22L	66.489	3
MST162	64.0586	1		NRD1	65.835	7
FAM86B1	64.0484	6		RTFDC1	65.5554	3
AFG3L2	63.9421	2		LOC101930047	65.3524	1
TTLL11	62.4991	5		ZNF45	65.3524	1
RSRC1	61.6012	8		ARFGAP3	64.9427	4
PVALB	61.5755	2		DEPDC7	64.7074	2
UBE2Q1	61.5755	2		DKFZp686N1969	64.0943	1
AIP	60.9761	1		PRPF31	63.722	2
ARHGDIA	60.9761	1		ZW10	62.8986	3
LRRC58	60.9761	1		SLC46A2	61.6462	2
MRPL12	60.9761	1		RABEP2	60.6016	5
PPID	60.9761	1		USP37	60.1152	6
PRR14L	60.9761	1		CENPM	59.1771	2
PRTG	60.9761	1		DCAF11	59.1375	4
RFWD2	60.9761	1		ERCC6-PGBD3	59.0092	1
RBM15	60.5005	2		ADIG	58.5992	2
LOC101929301	59.6332	2		GHSR	58.5992	2
KLC2	59.2093	1		KCTD10	58.5992	1
NDUFA4L2	59.2093	1		LOC101927859	58.5992	1
SCHIP1	59.2093	2		LOC388906	58.5992	1
LOC102724215	58.7313	1		OR1L6	58.5992	2
IRF5	58.6864	10		UPRT	58.5992	1
THOP1	58.3716	4		MAGOH	58.3411	1
SNX7	58.3602	4		MCM9	58.0761	2
ACSM3	57.835	2		MST162	57.9806	1
PLA2G15	57.8094	3		ITGAL	57.613	4
CS	57.4784	8		TMC3	56.9824	2
ARFGAP1	56.4607	1		AIP	56.7766	1
HEL-S-274	56.4607	1		CRYZL1	56.7766	1
SUN3	55.3955	3		ILKAP3	56.7766	1
HGS	55.2306	2		PRSS3	56.7766	2
SLC44A2	54.5452	4		TMEM249	56.7766	2
RNF19B	54.3191	5		STRC	55.3797	4
ZNF771	52.6886	1		BCKDHB	54.9123	3
INSM2	51.8718	1		DUSP27	54.411	1
DUSP27	51.7574	1		hCG_32740	54.1343	1
SAMD11	51.1709	6		DDX49	53.9655	1
ASCL2	49.8811	1		HIP1	52.8555	3
CDY2B	49.8811	1		ACADVL	52.7807	8
GABRA3	49.8811	2		KLHL29	52.2923	2
GPBP1L1	49.8811	1		ARHGEF11	51.7952	12
IGF1	49.8811	1		ITSN1	51.639	13
SGK3	49.8811	2		LIPG	51.0688	3
UBC	49.8811	1		HS3ST3A1	50.4185	1
ZNF658B	49.8811	1		IFIT1B	50.4185	1
ZSCAN4	49.8811	1		LOC102724724	50.4185	1
ATOH7	49.485	1		PHACTR1	50.4185	1
CCDC117	49.485	1		TRMT1	50.0986	1
DERA	49.485	1		ADRB3	49.9534	3
DHRS13	49.485	1		FUT8	49.5119	2
FAM213A	49.485	4		CT75	49.3862	1
FRK	49.485	1		CAMTA2	49.1827	1
GNAT1	49.485	1		SCO2	49.1045	2
HAS1	49.485	1		SMARCA5	49.0105	1
hCG_33128	49.485	1		HS3ST6	48.6558	3
NT5M	49.485	1		BCAS4	47.808	1
PCCB	49.485	1		GREM2	47.808	2
PPM1E	49.485	3		hCG_2018282	47.808	1
RGS9BP	49.485	1		OR10G6	47.808	1
TRA@	49.485	1		PRR14L	47.808	1
ZKSCAN4	49.485	1		SGSM2	47.6281	4
ZNF74	49.485	1		ADK	47.5385	2
FOXO4	49.3423	1		ALDH8A1	47.5385	1
SNTB2	49.3423	1		C20orf141	47.5385	1
C14orf79	48.9158	3		C21orf58	47.5385	1
APOC2	48.8684	2		CCDC86	47.5385	1
PCLO	48.4766	5		CDK1	47.5385	1
MAP7	48.2567	9		CHTOP	47.5385	1
FAM161B	47.5832	2		COL24A1	47.5385	1
NPTX1	46.7311	1		DHX33	47.5385	1
PCDHGB6	46.7311	1		EML1	47.5385	1
PNPLA2	46.4156	2		IKZF2	47.5385	1
MAP3K15	45.9346	2		LOC101928969	47.5385	1
TENM3	45.8305	5		OR1L4	47.5385	1
NKD1	45.7215	2		PITX1	47.5385	1
KCNQ1	45.3409	2		R3HDM2	47.5385	1
FAM118B	45.3167	6		RCC1	47.5385	2
ARL8B	45.0412	2		SLC5A9	47.5385	3
FAM189A1	45.0412	1		SYF2	47.5385	1
KDM4A	45.0412	2		ZNF343	47.5385	1
PCDHGA10	45.0412	1		ZNFN1A2	47.5385	1
INTS8	43.8851	5		TNKS2	47.0858	2
CCNI2	43.7688	3		ZNF415	45.8095	6
RIBC2	43.7674	3		TNFRSF18	45.5402	4
ERAL1	43.2045	4		HGF	45.3907	2
FIP1L1	42.7034	2		NHLRC2	45.3832	1
PEX26intG231T	42.7034	1		TIMM17B	45.3832	1
RAD9B	42.7034	1		PABPC3	44.9765	2
ZBTB46	42.7034	1		SRGAP3	44.8486	3
ARHGEF1	42.4878	6		LOC102723874	44.5115	1
C7orf25	41.7104	3		DOK3	44.2307	3
ZNF90	41.6925	1		PKP3	44.2098	2
BRD1	41.6166	1		CCKBR	43.7089	2
BCR-ABL1	41.352	1		NOTCH2	43.536	3
C19orf28	41.352	1		CHD1L	43.4168	10
CDHR1	41.352	1		FBXW5	43.3228	2
DKFZp686J17173	41.352	1		LOC102725117	43.3228	1
DKFZp781N0293	41.352	1		DKFZp779N0926	43.0738	1
ECAC1	41.352	1		TDP1	43.0079	7
HLA-DPB1	41.352	1		PICK1	42.9394	4
HSPBAP1	41.352	2		LMO1	42.5257	5
PRKRIP1	41.352	1		ZSWIM6	42.4932	2
RAD21L1	41.352	2		SENP6	42.258	7
ZNF45	41.2448	1		A4GALT	42.2517	4
RGMB	40.8101	3		LOC102723995	41.5424	1
DHDDS	40.4725	9		LOC100996846	40.7624	1
SRSF4	40.3725	2		MYEOV	40.7298	2
CTNNA3	40.1752	5		IST1	40.3973	11
NACC2	39.7673	1		ERCC6	40.2873	2
TRAF2	39.3377	6		STARD3	40.1775	13
AMBRA1	39.3159	7		FRG1	39.9951	2
TTC7A	39.0724	4		SCAPER	39.6829	6
LOC101929845	37.9931	1		DKFZp686J17173	39.6624	1
LOC102723974	37.9931	1		HCR	39.6624	1
NAPG	37.9931	2		KLHL9	39.6624	1
ST8SIA1	37.9931	1		ANK3	39.6197	28
ZNF865	37.9931	1		C20orf201	39.6099	1
FP972	37.8915	1		GJD4	39.6099	1
MYOC	37.487	2		GLRB	39.6099	1
POLN	37.1502	2		HLA	39.6099	1
PPL	36.7826	5		LOC100996843	39.6099	1
GRIN3B	36.5439	1		LOC441242	39.6099	1
KIAA1466	36.5439	2		MAGEE1	39.6099	1
LOC101928058	36.5439	2		PCGF2	39.6099	1
NOC4L	36.5439	1		SLFN13	39.6099	2
PCDHGA12	36.5439	1		SNAPIN	39.6099	1
PPFIBP1-ALK	36.5439	1		TERF1	39.6099	4
DSP	36.1147	3		CDKAL1	38.9568	2
NUAK1	36.1009	1		DNAH12	38.7324	5
OAS3	36.1009	2		FSIP1	38.6083	2
GTBP	35.8811	1		TTLL11	38.4708	5
DOK3	35.0684	4		KIDINS220	38.3711	1
DKFZp564M2178	34.7833	1		TXNRD3	37.9584	2
STRA8	34.7833	1		PHRF1	37.9214	10
DCDC5	34.5455	2		RNF10	37.753	4
REST	33.9868	1		ARHGEF5	37.4145	4
MLL	33.949	2		PANK4	36.9946	2
LLGL2	33.749	1		H2AFZ	36.5959	2
A2BP1	33.622	1		SYNM	36.3781	5
ADCY5	33.622	2		PLA2G4E	36.308	3
ALOX15B	33.622	1		GITA/7p	36.3069	1
ANKS4B	33.622	1		GOLGA6L2	36.3069	2
ATP5H	33.622	1		LOC283685	36.3069	1
BHLHB9	33.622	1		SLCO1C1	36.1496	5
COX6A1	33.622	1		RORB	36.1165	2
ERMP1	33.622	1		C6orf132	35.9176	1
FOXC2	33.622	1		QSOX2	35.9176	1
GK2	33.622	1		NT5M	35.8961	2
HARS	33.622	1		ZNF75D	35.777	4
HEATR7A	33.622	1		C10orf12	35.6561	2
HEXDC	33.622	1		RBM33	35.5171	7
ISG12	33.622	1		MFHAS1	35.2115	1
KATNBL1	33.622	2		DNER	35.1858	2
KRT24	33.622	1		AHCYL2	34.932	3
LRRC48	33.622	1		LRTM2	34.8543	1
NR2E1	33.622	1		WNT2B	34.8324	3
PCDHA4	33.622	1		PCDH17	34.6597	2
SNRPA	33.622	1		HEATR1	34.432	4
SSX4	33.622	1		ZNF878	34.3281	2
SYNE3	33.622	1		PRKACG	34.3269	1
TFG/ALK	33.622	1		H2AFV	34.2656	4
VPS4A	33.622	1		CTNNA1	34.0686	4
ZNF467	33.622	2		ZNF292	33.8402	4
C11orf82	33.4245	1		RALA	33.4746	3
APOA1	33.3834	2		CCHCR1	33.1175	13
VPRBP	33.0384	4		FRYL	33.0917	2
WEE1	32.9813	4		COL19A1	32.7692	1
THRAP3	32.6685	2		ZDBF2	32.5809	3
DKFZp761D171	32.648	1		ABCB4	32.2143	4
CPEB2	32.5325	5		DKFZp434K0126	32.1823	1
METTL13	32.2602	4		FLOT1	32.1823	1
RIT1	32.2042	3		hCG_1991922	32.1823	1
LUZP4	32.0161	3		IGSF9B	32.1823	1
CARD10	31.9663	2		ITPA	32.1823	1
ADGB	31.8238	3		LOC100996763	32.1823	1
EPPK1	31.6943	3		LOC101059976	32.1823	1
CDY2A	31.5444	2		MET	32.1823	1
DDX50	31.5444	1		MROH9	32.1823	1
DOC2A	31.5444	1		MYOD1	32.1823	1
FAM162B	31.5444	1		OR4D9	32.1823	1
GRM6	31.5444	1		PAPPA2	32.1823	1
GSTCD	31.5444	1		PKP1	32.1823	1
IFIT1B	31.5444	1		PRMT1	32.1823	2
ISYNA1	31.5444	1		ranbp3	32.1823	1
KBTBD11	31.5444	1		RANBP3	32.1823	1
MATN2	31.5444	1		SNAP23	32.1823	2
NCAPG	31.5444	2		SPAG16	32.1823	1
PCDHGA1	31.5444	1		STOML2	32.1823	1
TRPM8	31.5444	1		TYW1B	32.1823	1
TUBB4A	31.5444	1		USP3	32.1823	2
KIF1A	31.4011	13		VPS16	32.1823	1
CCDC86	31.2994	1		ZKSCAN7	32.1823	2
ZCCHC17	31.2994	2		PAMR1	31.7892	4
PCDHGB2	30.8821	1		WDR19	31.636	5
ATG4D	30.8639	1		RNF39	31.5503	1
PRKG2	30.8639	2		EIF3A	31.4259	4
SFRS4	30.8639	1		CHD9	31.1299	9
TCEAL7	30.8639	1		SAC3D1	31.098	2
GRIN2C	30.2774	6		C11orf57	31.087	1
TUBGCP6	30.2282	5		MMP28	31.087	1
HDGFRP2	30.224	4		XPNPEP3	31.087	1
TLR5	29.9548	18		RILP	30.5562	3
SASH1	29.8492	5		STXBP1	30.5163	2
ZNF658	29.7669	4		FEZF2	30.4075	1
KNG1	29.6108	6		SYNE3	30.2833	3
ZNF541	29.5757	5		RTN4	30.1865	7
RLF	29.3231	1		MYO16	30.1437	3
N4BP2L2	29.2954	4		C9orf171	30.118	1
HELLS	29.1846	12		CCDC174	30.118	1
FAM193A	29.1376	7		HSPA1A	30.118	1
RBFOX1	29.1281	13		HSPA7	30.118	1
JPH4	28.7525	1		NR1F2	30.118	1
RBFOX2	28.6313	8		TBC1D13	30.118	1
SRA1	28.6197	2		VARS2	30.118	2
MICU1	28.6039	2		MUC16	30.0502	4
KMT2A	28.4983	4		SLC4A11	29.8868	5
AFF2	28.3493	7		DKFZp686L0695	29.7317	1
RABEP2	27.9844	4		HIST1H1D	29.7317	1
PNISR	27.7549	6		STUB1	29.6397	2
DKFZp686K23100	27.7391	1		ERI2	29.4203	2
NOMO1	27.7391	1		ERICH2	29.4086	1
PPARGC1B	27.5608	5		FBXL7	29.4086	4
F2	27.309	4		SLAIN1	29.4086	1
WHAMM	27.2822	2		DKFZp434N1610	29.3766	1
PDE10A	27.0543	3		FMNL1	29.1763	11
FAIM2	27.0334	2		GDF5	28.8823	6
NMDAR2C	26.8405	1		eIF3a	28.8237	1
PTPRA	26.8405	5		EARS2	28.5758	4
UNR	26.8405	1		TUBGCP6	28.4712	5
ENTPD2	26.8031	2		ILKAP	28.3857	3
EPB41L5	26.6274	8		LOC102725326	28.2895	1
USP3	26.5093	10		WHSC1	28.1288	7
ZNF521	26.2535	5		EGLN1	28.1231	10
ZNF66	26.2434	2		HSPA12B	27.7715	7
CYP4F22	26.1141	1		PANX2	27.7474	3
PCDHGA2	26.1141	1		MYO3B	27.6815	5
TLCD2	26.1141	1		CTNND2	27.5624	8
TSC1	26.1141	1		RHOD	27.3125	2
ANAPC5	25.695	1		TMPRSS15	27.2684	3
BHLHE22	25.695	1		FAM71E2	27.2193	1
DKFZp686P17171	25.695	1		ABR	27.2086	2
DKFZp781H1314	25.695	1		LRRC49	27.0743	4
DYM	25.695	1		ATF7IP2	27.0214	2
ITGA1	25.695	1		ATP1B1	27.0108	3
MRPS2	25.695	1		MAP3K11	26.4749	1
PAN3	25.695	1		ADAM28	26.219	3
SEL1L2	25.695	1		PGS1	26.2018	2
SNAPIN	25.695	1		MYOT	25.8402	4
TRIT1	25.695	1		AKAP12	25.7544	3
WDR9	25.695	1		EME2	25.5311	3
PROSC	25.6792	2		DKFZp451F083	25.4655	1
DNAJA3	25.6634	2		PEX26intG231T	25.4655	1
PCDHGA6	25.6634	1		SKI2W	25.4655	1
RBM6	25.4631	4		OTOA	25.1817	5
COL1A2	25.4322	1		AGPAT9	25.1385	2
NBEAL2	25.4298	2		FRAS1	25.0643	9
KIFC2	25.3777	3		GPX8	24.9506	3
CCDC24	25.3392	3		RB1CC1	24.903	3
ST7L	25.1803	5		GABRA2	24.8115	1
ARHGEF11	24.9697	12		INSM2	24.8115	1
ITSN1	24.7667	10		C12orf55	24.6905	4
LRP1B	24.633	2		LOC101927853	24.5506	4
FASN	24.1562	1		CROT	24.5069	1
PI4KB	24.0161	6		FCRLB	24.5069	1
PRF1	23.93	2		FDXR	24.5069	1
CCDC102B	23.9148	2		HUNK	24.5069	1
LOC101930320	23.8115	1		LRRC34	24.5069	1
STK32C	23.7823	2		RGAG1	24.5069	1
ZNF574	23.7211	1		RNF169	24.5069	1
ZNF100	23.5253	4		SVIL	24.5069	1
ARHGAP42	23.5121	2		TEX13B	24.5069	1
POSTN	23.4464	3		TGFBRAP1	24.5069	1
SPATA7	23.3421	8		TSSK2	24.5069	1
CLUH	23.1694	8		ZIM3	24.5069	1
SRRM2	23.0939	6		ZNF195	24.5069	1
CDC27	23.0894	4		C14orf80	24.4882	3
ALDH8A1	23.0699	2		MKL2	24.466	2
CSPG5	23.0699	2		AGAP3	24.4251	2
SRP72	23.0699	2		dJ402G11.9	24.4251	1
TTC21B	22.9745	2		GFPT2	24.4251	1
VCL	22.7729	5		GRIP1	24.4251	1
POM121C	22.76	1		HIST1H1A	24.4251	1
ANKRD32	22.724	1		HIST1H1B	24.4251	1
EGLN1	22.4514	11		IDI1	24.4251	1
NOXIN	22.4201	1		POLR2	24.4251	1
CSDE1	22.2113	5		RRP12	24.3619	4
RPS6KB1	22.1949	3		WNK3	24.3432	2
NPRL3	22.1776	3		TEK	23.9572	5
PCDHGC3	22.1147	2		HCN1	23.9553	2
ZNF462	22.0604	2		U2SURP	23.8931	6
POM121	21.9976	2		USP15	23.8116	5
ELMO3	21.9455	2		RALB	23.7527	5
PPFIBP2	21.8528	14		ANK1	23.6157	6
COL4A1	21.7458	1		LAMB3	23.6007	1
DEAF1	21.7458	1		ATP8B1	23.5467	3
hCG_2004980	21.7458	1		USP8	23.4808	3
LOC100507656	21.7458	1		USP48	23.4456	12
MFHAS1	21.7458	1		SYNE1	23.2548	5
PCDHGA4	21.7458	2		PEX1	23.1987	5
SAC3D1	21.6977	2		ZNF845	22.9181	3
BRD8	21.6423	6		CHD8	22.7873	2
CD163L1	21.4898	5		LOC102724215	22.6997	1
PGS1	21.4577	1		CPAMD8	22.6694	2
AKAP10	21.3212	2		MEGF8	22.5743	4
LOXL3	21.1978	2		PUM1	22.571	4
PLEKHA6	21.1523	7		DKFZp761D171	22.558	1
MSH6	20.982	4		DAPK3	22.5336	1
AXIN2	20.9423	1		hCG_1811453	22.5336	1
CTAGE4	20.9423	1		CAMSAP1	22.3154	4
CTAGE8	20.9423	1		CARD14	22.1195	3
ELP2	20.9423	2		PRPF8	22.006	1
FOXRED2	20.9423	2		TGFBR1	21.9538	4
HLA-C	20.9423	1		TRDN	21.8958	3
MOCS1	20.9423	1		SKIV2L	21.8094	5
PCDHGA3	20.9423	1		ISYNA1	21.5295	1
PLEKHA8	20.9423	1		PYGB	21.5295	1
SPTLC2	20.9423	1		COPG1	21.4671	1
TCIRG1	20.9423	1		HGSNAT	21.4671	1
VBP1	20.9423	1		SPAG5	21.4671	1
YY1AP1	20.9423	1		PAN2	21.3677	4
ZFY	20.9423	2		BZW2	21.0053	3
ZSCAN5A	20.9423	1		KIAA0556	20.8244	2
DOPEY2	20.8555	1		GSE1	20.7399	10
ZC3H18	20.8555	2		UIMC1	20.6721	2
PCDHA2	20.837	2		AGBL3	20.6318	1
CNTLN	20.7101	6		CORO7-PAM16	20.6318	1
PDZD4	20.5821	4		CRYBG3	20.6318	1
ACVR1C	20.4449	1		DKFZp586H1823	20.6318	1
AK5	20.4449	3		LOC101929571	20.6318	1
CDK8	20.4449	1		NEU4	20.6318	1
CLIP4	20.4449	1		TTLL13	20.6318	1
DCDC2	20.4449	1		ZNF653	20.6318	1
EEF1D	20.4449	1		TCEB3B	20.483	2
MAGEF1	20.4449	1		CMTR1	20.2545	2
MPP5	20.4449	1		OTUD7A	20.2545	2
MRVI1	20.4449	1		PSMD10	19.9585	5
PLS1	20.4449	1		ALAS1	19.904	1
POLI	20.4449	3		ASIC5	19.904	1
PPP3R1	20.4449	1		BPIFB4	19.904	1
PUS7	20.4449	1		CCDC132	19.904	1
SLC2A4RG	20.4449	1		CENTG3	19.904	2
SQSTM1-ALK	20.4449	1		CORO7	19.904	1
ZBTB41	20.4449	1		CR2	19.904	1
ABCB7	20.3565	5		EFTUD1	19.904	1
DNTTIP1	20.3386	3		ETF1	19.904	2
TNKS1BP1	20.2038	2		EXOC6B	19.904	1
ARHGAP5	20.1837	2		FLJ00132	19.904	1
FBLL1	20.1837	2		GITA/3p	19.904	2
HCN2	20.1837	1		LOC102724516	19.904	1
SLTM	20.1049	7		LRRC14B	19.904	1
FHOD3	20.0888	15		LRRK1	19.904	1
RAPGEF4	20.04	7		MAGIX	19.904	1
SSPO	20.0294	1		MPDZ	19.904	1
MATR3	19.9504	3		NUP107	19.904	1
GCC2	19.9127	7		PDE10A	19.904	1
PKHD1	19.7358	2		PTPN14	19.904	1
MCRS1	19.6974	2		RHOBTB1	19.904	2
IQGAP1	19.6331	4		RIOK3	19.904	1
DKFZp781K06126	19.5764	1		STMN4	19.904	1
CHD1L	19.5044	6		TNS3	19.904	1
SRGAP3	19.5021	3		VRK3	19.904	3
ZFP64	19.3645	5		NPAS1	19.8912	2
STAU2	19.3627	3		AUTS2	19.4812	3
ZSCAN32	19.3627	3		H2AFY2	19.4612	2
TRAPPC11	19.3596	2		RIPK4	19.3669	3
MAGED2	19.3563	3		PCDP1	19.2778	2
DCUN1D5	19.3159	5		DGKQ	19.0695	1
IMMT	19.2962	1		ERC2	19.0695	2
TSPEAR	19.274	3		KLHL25	19.0695	1
SERBP1	19.2621	4		OBSCN	18.9229	40
DZIP3	19.2237	3		GYS2	18.8818	3
IFI16	19.2145	6		SPEF2	18.8777	7
CACNA1G	19.2013	30		ZC3H3	18.647	4
NRCAM	19.1636	12		ATP2C2	18.4896	3
C11orf96	18.95	1		KIAA1549	18.3512	5
C16orf35	18.95	1		PTPsigma	18.2578	1
GLTSCR2	18.95	1		C6orf18	18.1134	2
ITK	18.95	1		ERICH3	18.0596	4
PANK4	18.95	1		ENTHD1	18.0489	4
YKT6	18.95	1		ABCC2	17.9026	4
ZBED4	18.95	1		EIF4G2	17.876	5
GFM1	18.8441	5		STIM1	17.828	5
DCST1	18.8215	2		UBE2C	17.8144	6
TNNI2	18.8215	2		CCDC17	17.7472	7
SPIDR	18.7883	5		DPYSL3	17.5535	3
GPHN	18.7381	3		UBE4B	17.4978	3
ZNF831	18.7106	2		R3HDM1	17.4718	13
PDE8A	18.6999	4		CCDC114	17.4128	3
DDX51	18.6321	2		IBTK	17.296	7
DNAJC7	18.5728	4		AMBRA1	17.2917	6
GDI2	18.5728	2		CLSPN	17.172	3
GREB1	18.5626	6		RBM15B	17.0247	1
GIGYF2	18.4941	5		OSBPL6	16.9425	1
HS6ST2	18.431	3		NUP210L	16.9255	3
WDR78	18.3468	3		DUS4L	16.9091	2
MYO7A	18.3407	8		AMOTL1	16.8516	5
ABL2	18.3157	8		ARMC2	16.8373	1
VCP	18.2304	2		C19orf43	16.8373	1
PCDHGA9	18.2098	1		dik	16.8373	1
RARS2	18.2098	1		ERCC6L2	16.8373	1
PCDH11X	18.1137	7		HES6	16.8373	1
TTN	18.1079	14		KIAA1598	16.8373	1
INO80	18.0388	1		LRRC63	16.8373	1
POLD1	18.0388	1		MICAL3	16.8373	1
CD22	17.9488	3		MIR3654	16.8373	1
MED17	17.8313	3		MMP23B	16.8373	1
CCDC114	17.7769	3		NFKBIZ	16.8373	1
CCDC36	17.7769	2		PABPC1	16.8373	1
CLOCK	17.7769	1		RRS1	16.8373	1
ELL	17.7769	1		WUGSC:H_DJ0855D21.2	16.8373	1
MPO	17.7769	1		MTDH	16.6787	5
PCDHGA8	17.7769	1		AMD1	16.6291	3
ZDHHC1	17.7769	1		SRP54	16.5244	4
KCNMA1	17.7526	5		FHOD3	16.5054	17
LOC392742	17.7463	1		PNPLA7	16.439	7
JRK	17.7269	3		COL4A3	16.1516	8
AUTS2	17.7014	5		PPL	16.0578	5
ALK	17.6675	16		THADA	16.0574	9
FMN1	17.6335	2		SLC38A10	16.0512	2
CEP78	17.6075	8		CCT3	16.045	3
FNDC3A	17.5996	4		SREBF2	16.0275	2
MKL2	17.5491	5		ZNF443	15.9906	3
NEK5	17.4252	5		HIPK3	15.8943	2
DMXL2	17.3916	7		IFFO2	15.8943	1
PHACTR2	17.3263	2		JMJD1B	15.8943	1
KIF2C	17.2622	4		TNPO2	15.8943	1
ATP5A1	17.2388	2		ZBTB24	15.8943	1
ACAP3	17.2257	6		ZNF775	15.8943	1
LOC102724378	17.216	3		PNMA1	15.7428	2
DCDC1	17.1956	2		DENND4A	15.7019	3
LOC101060770	17.085	1		SIN3A	15.7019	1
GTPBP4	17.0638	5		AGAP1	15.6287	1
ABCA10	17.0564	2		DDX54	15.5962	3
GRIK2	16.9845	4		REXO1	15.4582	2
SPHKAP	16.9676	7		APOA1	15.3137	2
GRM1	16.9404	3		LRP3	15.1056	2
COL25A1	16.8555	1		LTF	15.0949	4
GCC1	16.8555	1		VPS33A	14.6554	2
TBKBP1	16.8532	2		DDX55	14.6483	2
PRDM1	16.8091	6		DENND2D	14.6483	1
KIAA1731	16.7392	6		EFHB	14.6483	1
HDLBP	16.7014	7		GUCY2D	14.6483	1
A1CF	16.7007	1		KCNB1	14.6483	1
CCDC85A	16.7007	2		LCHN	14.6483	1
CD46	16.7007	1		LPCAT1	14.6483	1
DCXR	16.7007	1		OLFML2A	14.6483	1
DDX17	16.7007	2		PHF21A	14.6483	1
DKFZp686H20196	16.7007	1		RARS2	14.6483	1
DKFZp781B0869	16.7007	1		RARSL	14.6483	1
FBXW12	16.7007	1		SCAF4	14.6483	1
FGD6	16.7007	1		SPATA20	14.6483	2
FIGNL2	16.7007	1		MARCO	14.5203	2
JRKL	16.7007	1		USP11	14.4409	3
LINC00162	16.7007	1		RIMS2	14.3827	10
MAP4K5	16.7007	2		TMSB10	14.3791	1
MTERF	16.7007	1		ARHGEF1	14.3319	8
OVOS1	16.7007	1		BRDT	14.3194	2
PCDHGB4	16.7007	1		NEURL4	14.317	1
PTPRZ1	16.7007	2		SENP2	14.317	1
SCXA	16.7007	1		PREX2	14.3078	2
SLC3A1	16.7007	1		ZNF439	14.2702	2
TMEM245	16.7007	1		PPFIBP2	14.1117	13
TXLNG	16.7007	1		RNF19B	14.0593	5
ZNF429	16.7007	1		QARS	13.8053	6
ZNF768	16.7007	2		ANKS6	13.746	6
ZBTB21	16.6367	2		PRG4	13.6951	4
DKFZp666P0310	16.6326	1		DOCK3	13.4239	9
DKFZp781N1974	16.6326	1		NUP133	13.3387	1
PIK3C3	16.6326	1		KIF28P	13.3047	2
RPGR	16.6326	1		TPP2	13.2302	5
XPNPEP3	16.6326	1		NLRP4	13.1757	4
NCL	16.6106	2		CNKSR2	13.1098	6
PHKA2	16.462	4		KIAA0368	13.0576	3
DPP9	16.4526	3		NEFM	13.0574	4
BSN	16.4458	2		BRD1	13.0563	1
POGZ	16.4439	6		ZNF518B	13.0563	1
MAGIX	16.2194	5		LEF1	13.0081	2
KIAA0195	15.9923	2		LOC101060866	13.0081	1
PTPRM	15.9923	2		MOGS	13.0081	1
SGIP1	15.9923	2		OGDH	13.0081	1
ETF1	15.8598	3		RERE	13.0081	2
ATP7A	15.8459	3		SYDE1	12.9059	3
SCLY	15.7715	2		VCP	12.8885	2
DNAH1	15.6239	2		AFG3L2	12.8729	2
ADCY9	15.5735	3		PTPRD	12.6549	22
ADAM28	15.5238	5		INTS7	12.5529	3
CNKSR2	15.5185	1		EIF2AK2	12.4977	4
FAM69C	15.5185	1		SPIRE1	12.4502	4
FGFR2	15.5185	1		MYO1G	12.4461	2
HKR1	15.5185	1		MMRN2	12.3708	2
hREV3	15.5185	1		LOC101929587	12.3556	2
KLHL5	15.5185	1		RRBP1	12.3204	2
PCDHGA11	15.5185	1		MLL3	12.2973	1
SLC4A11	15.5185	1		RPGRIP1L	12.1321	9
NKTR	15.4603	5		SPTBN4	12.1257	4
PRMT3	15.4542	2		TMC1	12.0276	2
RNF130	15.4542	2		KDM3B	12.0261	3
NUMA1	15.4293	5		AASDHPPT	12.0259	2
SYNM	15.2874	5		MCM3AP	12.0259	1
DKFZp686L0869	15.2284	1		SAFB2	12.0259	1
LOC101060825	15.2284	2		SMCHD1	12.0259	1
FGD4	15.1812	4		USP54	11.9985	9
MEX3D	15.1436	3		SNW1	11.7846	2
LCT	15.1032	2		IFT172	11.7621	4
PPHLN1	15.0387	3		FAM208A	11.7551	3
SPIRE1	15.015	4		C15orf52	11.7335	1
ROBO2	14.9683	4		CCDC81	11.7335	1
KIAA1549L	14.9177	4		DLC1	11.7335	1
MYH13	14.8948	1		KIAA2018	11.7335	1
TAF1L	14.7517	1		TCEB3CL	11.7335	1
SORBS1	14.7319	29		CILP	11.7094	2
RGS9	14.7089	4		DKFZp686K0193	11.7061	1
PAMR1	14.5394	5		C1QTNF2	11.7031	1
ERICH3	14.4888	3		DKFZp686J0330	11.7031	1
PACS1	14.4678	2		DKFZp781J13156	11.7031	1
DKFZP586J0619	14.4395	2		EP400	11.7031	1
SPOCD1	14.3543	6		FGD6	11.7031	1
SFMBT2	14.3091	3		FKBP5	11.7031	1
DKFZp761O1618	14.2712	1		HEL-216	11.7031	1
PDLIM2	14.2712	1		IDH1	11.7031	2
ANKFN1	14.2176	3		IPO4	11.7031	1
ARHGAP31	14.2077	3		MIA3	11.7031	1
C12orf55	14.2077	2		mifr-2	11.7031	1
CCDC39	14.2077	1		PEX1R633Ter	11.7031	1
CDK16	14.2077	1		PLA2G3	11.7031	1
CDK6	14.2077	1		PRKCE	11.7031	1
DENND5B	14.2077	1		RNF180	11.7031	1
DKFZp686G11190	14.2077	1		RPS6KA4	11.7031	1
DKFZp686L17145	14.2077	1		SLC8A2	11.7031	2
DNAJC16	14.2077	1		SPATA31A6	11.7031	1
DUOX2	14.2077	2		TACC3	11.7031	1
DYTN	14.2077	1		WDHD1	11.7031	1
ELMOD3	14.2077	1		ZFP28	11.7031	1
FURIN	14.2077	1		POLR1B	11.6606	5
GALNTL6	14.2077	1		SCN5A	11.3709	5
GIPC2	14.2077	3		ZNF831	11.1784	2
GOPC	14.2077	1		AZI1	11.0543	1
LOC100129098	14.2077	1		GLB1L3	11.0543	1
LOC101928409	14.2077	1		NRXN3	11.0372	3
MAGED4	14.2077	2		RHBDF1	11.0343	4
MASP2	14.2077	1		GRM1	10.9259	4
MEN	14.2077	1		ANKRD11	10.8858	5
MTMR10	14.2077	1		CBLB	10.7694	2
OTUD3	14.2077	1		SASH1	10.762	5
PLEKHO1	14.2077	1		KMT2A	10.7363	3
RGAG4	14.2077	1		CCDC146	10.715	1
SCAF8	14.2077	1		CWF19L2	10.715	1
SEMA3F	14.2077	1		ODZ1	10.6909	1
SEPHS1	14.2077	2		BSN	10.679	2
STAG1	14.2077	1		AMOTL2	10.6743	4
SV2C	14.2077	2		SHOX2	10.6424	4
TRPV5	14.2077	1		CSMD2	10.557	3
VRK3	14.2077	1		ACLY	10.4788	3
ZHX1	14.2077	1		RAD54L2	10.4618	2
ZNF668	14.2077	2		DENND2A	10.4431	2
ARHGEF17	14.1277	1		ARFGEF1	10.4108	1
SFSWAP	14.0824	2		ATP2B3	10.4108	5
VCAM1	14.0519	3		CPS1	10.4108	1
ARHGEF15	13.9896	4		HAO2	10.4108	1
WDR17	13.974	4		HR	10.4108	2
RBM15B	13.9505	1		KDM5B	10.4108	1
ZNF518A	13.9505	1		KDM5D	10.4108	1
CHD9	13.9285	1		LMNB2	10.4108	1
LOC101930047	13.9285	1		LOXHD1	10.4108	1
SSC5D	13.9285	1		MCM8	10.4108	1
TCHH	13.9285	1		MLL	10.4108	1
CC2D1B	13.8752	3		MSH6	10.4108	1
ARMC4	13.8708	2		PARP3	10.4108	1
KIAA1211L	13.8535	5		PMCH	10.4108	1
FAM196A	13.8269	1		RILPL1	10.4108	1
PTPN3	13.8269	3		RPL3L	10.4108	1
SAMD1	13.8269	1		RUSC1	10.4108	2
TXNDC16	13.8269	1		TTK	10.4108	2
MTR	13.745	5		IGSF22	10.3497	2
BZRAP1	13.7247	2		NHSL1	10.3338	4
TES	13.6491	4		KIAA1751	10.154	2
GLG1	13.5403	3		DHX37	10.0722	3
HEATR5B	13.5357	5		COL4A4	10.0573	9
LOC102723995	13.365	1		C6orf10	9.99229	8
CMYA5	13.3608	1		NF1	9.95535	13
ALS2	13.3605	4		EPB41L3	9.91766	4
RAPGEF5	13.3186	2		OGDHL	9.90883	2
ANKRD17	13.0404	2		BMP1	9.88275	1
MARK2	13.0153	3		CASC3	9.88275	1
TYK2	12.9128	3		CCDC177	9.88275	1
PLCH1	12.8983	5		FAM230A	9.88275	1
CAMSAP1	12.8938	4		FMN1	9.88275	1
KSR1	12.8931	5		MED12	9.88275	1
PCNX	12.8666	1		ECM29	9.82257	1
SENP6	12.7915	2		PTPRS	9.81569	18
C6orf132	12.6342	1		TENM1	9.80593	3
MCM9	12.6342	1		CSPG5	9.70184	2
ITPKB	12.5896	1		ARID3B	9.65998	2
ANKRD34C	12.5132	1		RAI1	9.41121	2
CD109	12.5132	2		AMER2	9.40689	1
FBXO16	12.5132	1		CC2D1A	9.40689	2
HLTF	12.5132	2		GRIN3B	9.40689	1
LOC101927276	12.5132	1		IGDCC4	9.40689	1
LOC101927853	12.5132	3		KIAA1529	9.40689	1
LPIN3	12.5132	2		KIF5B	9.40689	1
PELP1	12.5132	1		NR2E1	9.40689	1
TNS3	12.5132	1		PHLDA2	9.40689	1
ATXN7L2	12.4853	3		RBBP8NL	9.40689	1
URGCP	12.4794	3		SCRT2	9.40689	1
RICTOR	12.4744	5		SEC31A	9.40689	1
POLR3E	12.4625	4		SRRM1	9.40689	1
C2CD5	12.4295	1		WWC2	9.40689	1
CKAP4	12.4295	1		PRRC2C	9.35467	18
DKFZp667N107	12.4295	1		KIFC3	9.30829	6
EMR2	12.4295	2		UBR5	9.29559	6
EPHB4	12.4295	2		ARID4A	9.29066	5
FAM149A	12.4295	1		TSGA10	9.19216	4
LOC101929185	12.4295	1		LOC101060464	9.19012	1
MBD1	12.4295	1		LPIN3	9.19012	1
PHKB	12.4295	3		SLMAP	9.19012	1
RAPH1	12.4295	1		DKFZp686H16106	9.14627	1
RET/PTC2	12.4295	1		CCDC39	9.13883	1
SMC1A	12.4295	1		LOC101928083	9.13883	1
SNAPC4	12.4295	1		HNRNPUL1	9.13597	7
ZMYND8	12.4295	1		UNC45B	9.11346	4
ZNF730	12.4295	1		PCF11	9.01802	3
TOPAZ1	12.3888	1		FN1	9.00591	8
KCNQ2	12.2722	5		KIAA0922	8.9651	4
CACNA1A	12.2505	10		BAI2	8.93066	12
TP53BP1	12.1495	6		AKAP13	8.93056	11
CADPS	12.1361	2		LIG3	8.83754	3
BRWD1	12.0053	4		DKFZp564M2178	8.81625	1
SETD8	11.9857	3		FP972	8.81625	1
HFM1	11.985	4		KMT2B	8.81625	1
LOC102724232	11.9831	1		EPG5	8.80541	4
JAG1	11.9457	2		CTNND1	8.73514	7
CTNND1	11.782	10		ZCCHC6	8.7339	6
PPP1R9A	11.7802	9		NFASC	8.67763	2
DCLK2	11.7638	2		SPATA13	8.65972	7
PKN3	11.697	3		AGBL2	8.60492	1
ZNF598	11.697	3		BBS7	8.60492	3
KCNT2	11.6632	3		COBL	8.60492	1
SCN2A	11.4991	4		DKFZp686D20222	8.60492	1
CYLC1	11.4929	3		DKFZp781K06126	8.60492	1
DKFZp686E18167	11.4641	1		KIAA1429	8.60492	1
MORC3	11.4641	5		LOC101930171	8.60492	1
POLR3B	11.4641	1		LOC102724286	8.60492	1
QRICH2	11.4641	1		SHROOM4	8.60492	3
SART1	11.4641	1		TCEB3C	8.60492	1
ZNF804B	11.4641	1		TCEB3CL2	8.60492	1
NUP188	11.3329	1		UBR4	8.60492	1
AURKC	11.2889	2		UPF1	8.60492	1
RAB11FIP1	11.247	2		CTNNA2	8.60491	1
TCEA1	11.247	2		TIAM2	8.60491	1
ADAMTS19	11.237	1		CACNA1A	8.57391	10
hCG_1741805	11.237	1		CIT	8.56176	3
PAPLN	11.2284	3		MYH7	8.52092	2
NF1	11.2107	3		KIF7	8.50818	5
MIB2	11.197	5		ATRX	8.45026	11
DNAH3	11.1718	2		SYNJ1	8.20534	4
APBA1	11.0981	2		CMYA5	8.17062	1
C10orf141	11.0981	1		SPNB4	8.12881	1
DAAM1	11.0981	1		TONSL	8.10411	2
EMILIN3	11.0981	1		TJP2	8.08987	3
IARS	11.0981	1		BRWD3	8.06666	5
PER3	11.0981	1		UBR1	8.03607	1
PIG37	11.0981	1		SHANK2	8.01672	4
PMPCA	11.0981	1		SMTN	8.00273	7
RTP2	11.0981	1		RBM6	7.94979	1
SND1	11.0981	1		RELN	7.94979	1
ZMYM2	11.0981	1		RORC	7.94979	1
CTR9	10.9018	1		SNX13	7.94979	1
HEL71	10.9018	1		DYSF	7.9203	16
MYH1	10.9018	1		PCNXL4	7.91011	4
TTBK1	10.8833	2		ABL2	7.74789	8
DLGAP4	10.8585	3		CEP131	7.67083	1
TERF2	10.817	1		NOL8	7.67083	3
SRRT	10.7721	7		ARHGEF4	7.6564	4
NOMO3	10.7226	3		ACAD10	7.53325	2
SPAG1	10.6383	2		NUP153	7.45338	5
DKFZp781O2021	10.6074	1		ABCA7	7.4076	2
HSPA12B	10.6074	1		FLJ00369	7.40478	1
IGFN1	10.6074	1		GARS	7.40478	1
RPRD2	10.6074	1		PHF2	7.40478	1
SPATA31A7	10.6074	1		PLEKHG5	7.40478	1
PTCH1	10.5813	2		RABGAP1L	7.40478	1
RASIP1	10.5813	2		SNED1	7.40478	1
SYNJ1	10.531	3		TTC21A	7.40478	1
ESPL1	10.4048	1		HELZ	7.36599	6
ZFC3H1	10.3595	1		SORBS1	7.35487	9
MYH7	10.2514	3		LAMA3	7.14845	1
ANKRD30A	10.2125	3		SSPO	7.14845	1
LOC100652824	10.199	3		ZFHX3	7.14845	1
ZNF106	10.135	4		COL1A2	7.14354	1
CAPN15	10.0645	2		COL3A1	7.13374	4
CNTNAP2	10.0645	1		DDX46	6.99936	3
GLI4	10.0645	1		PBRM1	6.96103	15
LMO2	10.0645	1		GALNT5	6.95919	1
LOC102724975	10.0645	1		AGL	6.94449	1
LRRC7	10.0645	1		CCDC88A	6.94449	1
PDE8B	10.0645	1		CEP152	6.94449	1
SLIT1	10.0645	1		DHX16	6.94449	1
SNCAIP	10.0645	1		FAM73A	6.94449	1
THSD7A	10.0645	3		FKBP15	6.94449	1
ZNF286B	10.0645	1		ZNF318	6.9074	1
ZNF782	10.0645	1		WNK2	6.69324	11
LTBP2	10.0069	4		TTN	6.68568	15
FLG	9.98388	4		FLG	6.67371	3
COL28A1	9.95103	1		DAPK2	6.66362	1
KIAA0287	9.95103	1		CCDC180	6.55076	1
SGSM2	9.90454	6		DKFZp761O1618	6.55076	1
MAP3K5	9.9035	4		SRBD1	6.55076	1
EIF2AK2	9.89489	1		CSMD3	6.53338	4
EML4-ALK	9.89489	1		CNTRL	6.52378	2
GALNT12	9.89489	1		MYH9	6.39974	1
PCDHGB7	9.89489	1		HYDIN	6.39329	2
AKAP6	9.87873	7		OTOF	6.30534	2
PEG3	9.86362	4		ZNF462	6.23875	3
ERBB2IP	9.85094	8		KIAA1009	6.21028	1
MAGI1	9.69709	12		RREB1	6.21028	1
PHF2	9.58672	2		SRCIN1	6.21028	2
POLQ	9.52637	4		SYTL2	6.21028	1
TAF1	9.47301	9		UTP20	6.16282	1
ACIN1	9.45358	8		NCOR1	6.16121	12
ADAR	9.39409	7		MYH13	6.13295	1
NFX1	9.38563	4		DST	6.1079	13
DKFZp686A1195	9.29342	1		IGFN1	6.04204	5
FAM71A	9.29342	1		SMARCA2	6.01009	3
RB1CC1	9.29342	3		ARHGAP21	5.95928	5
DNAH17	9.26036	3		EEA1	5.949	2
CENPC1	9.23948	1		MIBP1	5.949	1
DKFZp686N24126	9.23948	1		RIMBP3	5.949	1
KIAA1614	9.23948	1		ALPK2	5.91538	2
NPHP4	9.23948	4		GIGYF2	5.91307	2
NTN3	9.23948	1		ANK2	5.78003	9
RLTPR	9.23948	1		MYH6	5.73132	3
RNF17	9.23948	2		ATP8B3	5.65148	1
TOP2B	9.23948	1		CNTLN	5.65148	1
RIMS2	9.23087	2		KIAA0100	5.65148	1
AKAP12	9.22042	3		LRRC16A	5.65148	2
ZC3H13	9.19665	5		TEX15	5.65148	1
HEL37	9.14088	1		TSC2	5.65148	6
KIF1B	9.14088	1		TRIOBP	5.57861	1
SRRM1	9.13758	9		ATAD5	5.57103	1
EHBP1	9.13115	5		KMT2D	5.56472	4
GRIP1	8.95336	10		HECW1	5.41959	3
DSCAML1	8.95066	2		INTS1	5.41959	1
DEPDC5	8.90278	2		PCM1	5.41959	1
ABCA12	8.77917	1		RIMBP3B	5.41959	1
FLJ00246	8.77917	1		FSIP2	5.35029	2
GIPC3	8.77917	1		CENPF	5.30115	2
KIF13B	8.75592	2		MDN1	5.27756	5
SPEG	8.70653	12		PLEKHA7	5.257	6
APBB2	8.64992	4		MYH3	5.21269	1
KCNQ3	8.59766	2		COL1A1	5.17079	6
SLIT2	8.57862	6		MYO18A	5.16276	3
ABTB2	8.56609	1		DSP	5.14664	1
DKFZp586K091	8.56609	1		HEL71	5.13312	1
LOC441239	8.56609	1		LRP2	5.0856	4
NOMO2	8.56609	2		CCDC168	5.0565	1
DOPEY1	8.5642	4		NAV2	4.99155	7
NFASC	8.53256	9		EPPK1	4.97168	1
MGA	8.49172	13		MYO7A	4.84079	5
DNMT1	8.49155	5		HECTD1	4.70794	3
SLC4A4	8.45641	3		UNC13A	4.66194	3
INTS1	8.42946	1		ACACA	4.56993	4
KIF1C	8.42946	1		SLTM	4.51763	5
WIZ	8.42757	11		MXRA5	4.50692	2
DLGAP5	8.37331	2		COL6A6	4.49577	2
FRMPD1	8.33467	1		AIM1	4.48323	3
ZKSCAN2	8.33467	1		REV3L	4.46029	3
DDX10	8.2627	2		DKFZP586J0619	4.32839	1
TTLL3	8.12845	1		WIZ	4.17937	3
BIRC6	8.05456	13		CEP250	4.16409	6
AFAP1L2	8.05217	3		LOC392742	4.1243	1
JARID2	8.00643	1		MYH1	4.1243	1
SYNJ2	8.00643	1		SHANK3	3.94992	1
ZNF223	8.00643	1		KMT2C	3.90044	10
COL5A2	7.99103	1		ASH1L	3.89959	3
AGRN	7.94687	1		CDC42BPB	3.88034	1
UVRAG	7.74372	3		TANC1	3.88034	2
ARID1B	7.71176	8		RANBP2	3.78358	5
BLM	7.53425	3		GPR98	3.73185	1
FNIP1	7.53425	2		MTCL1	3.73185	1
PCDH8	7.53425	1		SOGA2	3.73185	1
RFC1	7.53425	1		DKFZp686B2325	3.66176	1
TTF2	7.53425	2		DKFZp686L2367	3.66176	1
TNRC18	7.44998	1		CELSR1	3.61502	2
TRIO	7.41036	5		CHD7	3.55407	2
RASAL2	7.3944	2		MYH7B	3.33157	4
OBSL1	7.38906	11		SETX	3.32675	1
LUZP1	7.30352	1		COL27A1	3.20629	2
MAST2	7.26201	7		UACA	3.19624	1
HMCN2	7.22587	6		FLNB	3.13807	2
DOCK9	7.19128	27		CKAP5	2.73186	2
COL4A5	7.13081	1		COL5A1	2.68252	3
EPRS	7.13081	1		NEB	2.42931	8
ITGB4	7.13081	1		MYH11	2.31582	2
PIK3C2G	7.13081	4		COL5A2	2.2892	1
RFX5	7.13081	3		HERC2	2.23683	3
ANKHD1	7.10133	2		PCLO	2.03258	3
LPHN3	7.06085	7		COL11A2	1.9306	9
PRRC2C	6.8789	18		MACF1	1.703	23
DNAH11	6.87609	4
CUX1	6.85975	2
HTT	6.79244	2
PCNXL2	6.78237	2
ZNF532	6.78237	1
KDM5A	6.74742	2
ARHGAP23	6.6651	6
SMC6	6.63942	2
CLIP2	6.4786	1
FBN2	6.4786	1
SPTY2D1	6.4786	1
ADAMTS8	6.21163	1
GRIP2	6.21163	1
PIKFYVE	6.21163	1
SCAF1	6.21163	1
TSC2	6.18932	3
ZFHX4	6.13257	4
CACNA1E	6.11066	7
ARHGEF4	6.08572	3
TG	6.0757	4
MAST3	6.0641	6
CIC	6.03482	1
DSCAM	5.97532	1
U2SURP	5.97191	3
COL22A1	5.92588	3
NACA	5.91318	5
ABCA7	5.88509	2
CDC42BPB	5.76056	6
COL4A3	5.73556	8
ATAD2B	5.58509	2
GLB1L3	5.5763	1
UTRN	5.55972	6
SEC16A	5.54348	5
AFF1	5.5381	8
DNAH5	5.394	2
ANKHD1-EIF4EBP3	5.29518	1
GCN1L1	5.29518	2
PRIC295	5.29518	1
FRAS1	5.27874	2
COL3A1	5.27368	3
LAMA3	5.25309	1
ERCC6	5.22767	2
ZZEF1	5.22309	5
ADAMTS12	5.16017	1
ANKRD18A	5.16017	1
ASXH1	5.16017	1
ASXL1	5.16017	6
MAP1S	5.16017	1
PTPRD	5.16017	4
SBF2	5.16017	1
MYO9A	5.14198	6
SZT2	5.1378	3
GRASP	5.11477	1
COL1A1	4.95854	1
MED12L	4.95854	2
MYH2	4.95854	1
PLXNB2	4.95854	1
DOCK4	4.92381	6
TPR	4.88666	1
CHD7	4.87064	1
AF-4	4.62179	1
TCEB3	4.62179	1
PKD1	4.61093	8
KIF1Bbeta	4.52728	3
SHANK3	4.5083	5
ANKRD11	4.50661	3
GPATCH8	4.48002	1
LIMCH1	4.43154	5
MPDZ	4.35261	1
VPS13D	4.30775	4
PDZD2	4.30513	6
MYCBP2	4.27855	8
FRYL	4.16179	4
CLIP1	4.13337	2
HIVEP3	4.03858	1
NYNRIN	4.03858	1
PHLPP1	4.03858	1
LOC285556	4.0366	6
COL4A4	4.01102	9
TRANK1	3.98145	3
C4orf21	3.95209	1
MYH6	3.87845	4
PRRC2A	3.84871	9
HYDIN	3.73354	2
AHNAK	3.53379	5
MACF1	3.5047	34
COL5A1	3.38728	1
XIRP2	3.30307	2
MDN1	3.25779	3
UBR4	3.20171	10
MUC16	3.09849	2
CEP350	3.07303	6
BAHCC1	2.79493	1
KMT2C	2.79493	4
CROCC	2.72386	5
NEB	2.63266	33
RESDA1	2.51598	1
COL11A2	2.05489	1
CCDC168	1.97636	1
PLEC	1.69831	16
